# Supplementary material for: Bioaccessibility and movement of phenolic compounds from tomato (Solanum lycopersicum) during in vitro gastrointestinal digestion and colonic fermentation
Source: Royal Society of Chemistry journal article supplement (doi:10.1039/d2fo00223j), 2022-01-01
Supplement: d2fo00223j1.pdf [file d2fo00223j1.pdf]

**Table 1S.** Identification and characterization of phenolic compounds through HPLC and LCMS.

| No. | Compound                      | Molecular Formula                              | RT (min) | MW (m/z) | [M - H] <sup>-</sup> (m/z) | Standard Equation (0 - 250 µg/mL) |
|-----|-------------------------------|------------------------------------------------|----------|----------|----------------------------|-----------------------------------|
| 1   | Gallic acid                   | C <sub>7</sub> H <sub>6</sub> O <sub>5</sub>   | 6.695    | 170.0215 | 169.0142                   | y = 2643x - 4585.4                |
| 2   | <i>p</i> -hydroxybenzoic acid | C <sub>7</sub> H <sub>6</sub> O <sub>3</sub>   | 19.071   | 138.0317 | 137.0244                   | y = 1440.6x - 2741.4              |
| 3   | Catechin                      | C <sub>15</sub> H <sub>14</sub> O <sub>6</sub> | 19.681   | 290.0790 | 289.0717                   | y = 809.19x - 2154.2              |
| 4   | Chlorogenic acid              | C <sub>16</sub> H <sub>18</sub> O <sub>9</sub> | 19.949   | 354.0951 | 353.0878                   | y = 3124.5x - 10872               |
| 5   | Caffeic acid                  | C <sub>9</sub> H <sub>8</sub> O <sub>4</sub>   | 24.521   | 180.0423 | 179.0350                   | y = 5843.3x - 12335               |
| 6   | Coumaric acid                 | C <sub>9</sub> H <sub>8</sub> O <sub>3</sub>   | 34.461   | 164.0473 | 163.0400                   | y = 6892.7x - 13346               |
| 7   | Kaempferol                    | C <sub>15</sub> H <sub>10</sub> O <sub>6</sub> | 79.902   | 286.0477 | 285.0437                   | y = 3736.2x - 34169               |

RT stands for “Retention Time”, MW stands for molecular weight and [M - H]<sup>-</sup> stands for molecular ions observed in negative ionization mass spectra

(a)

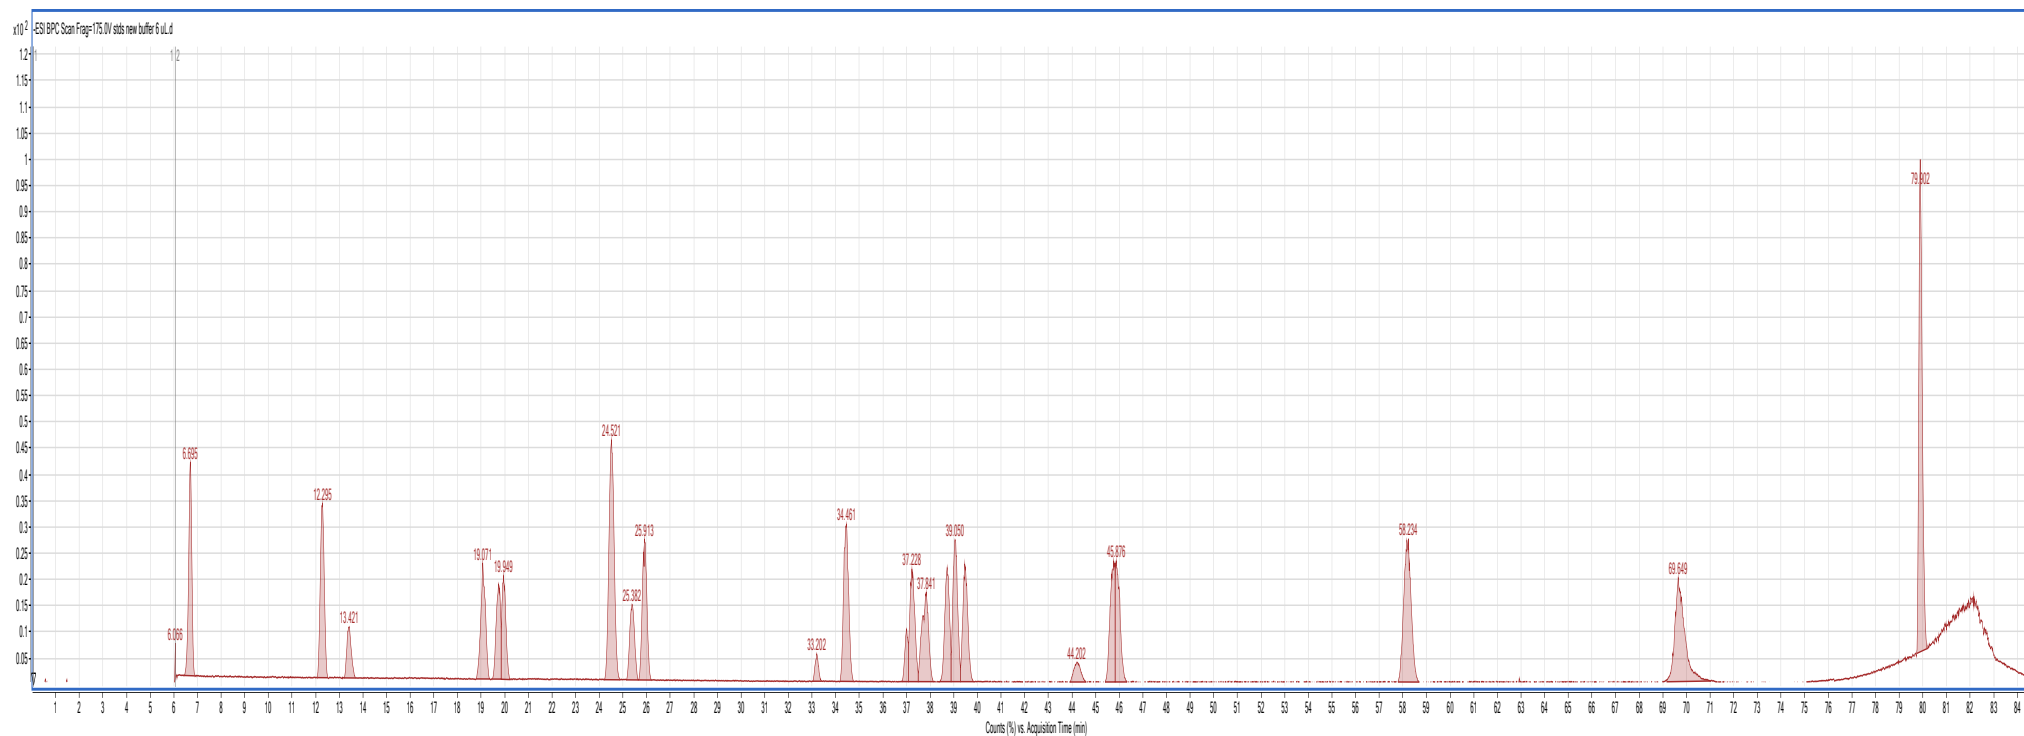

(b)

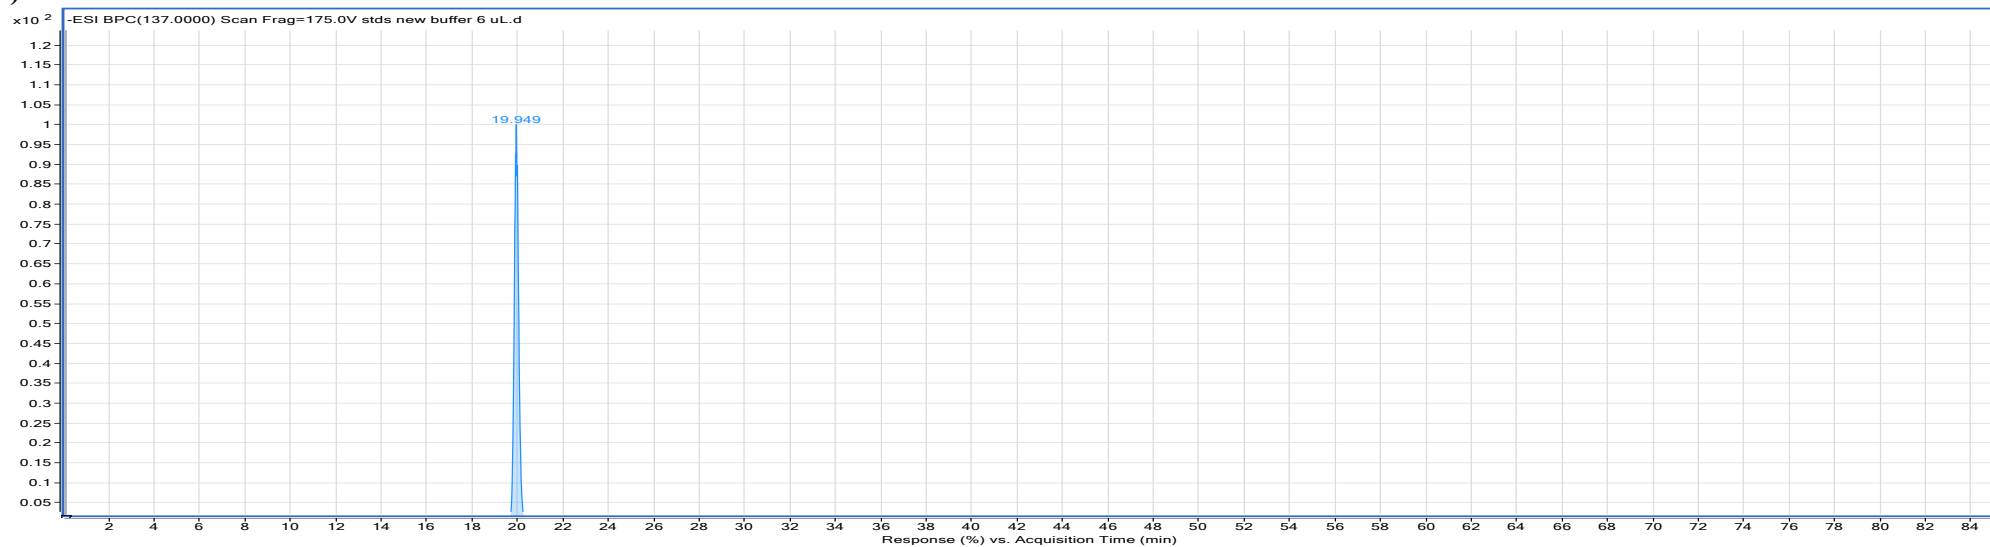

(c)

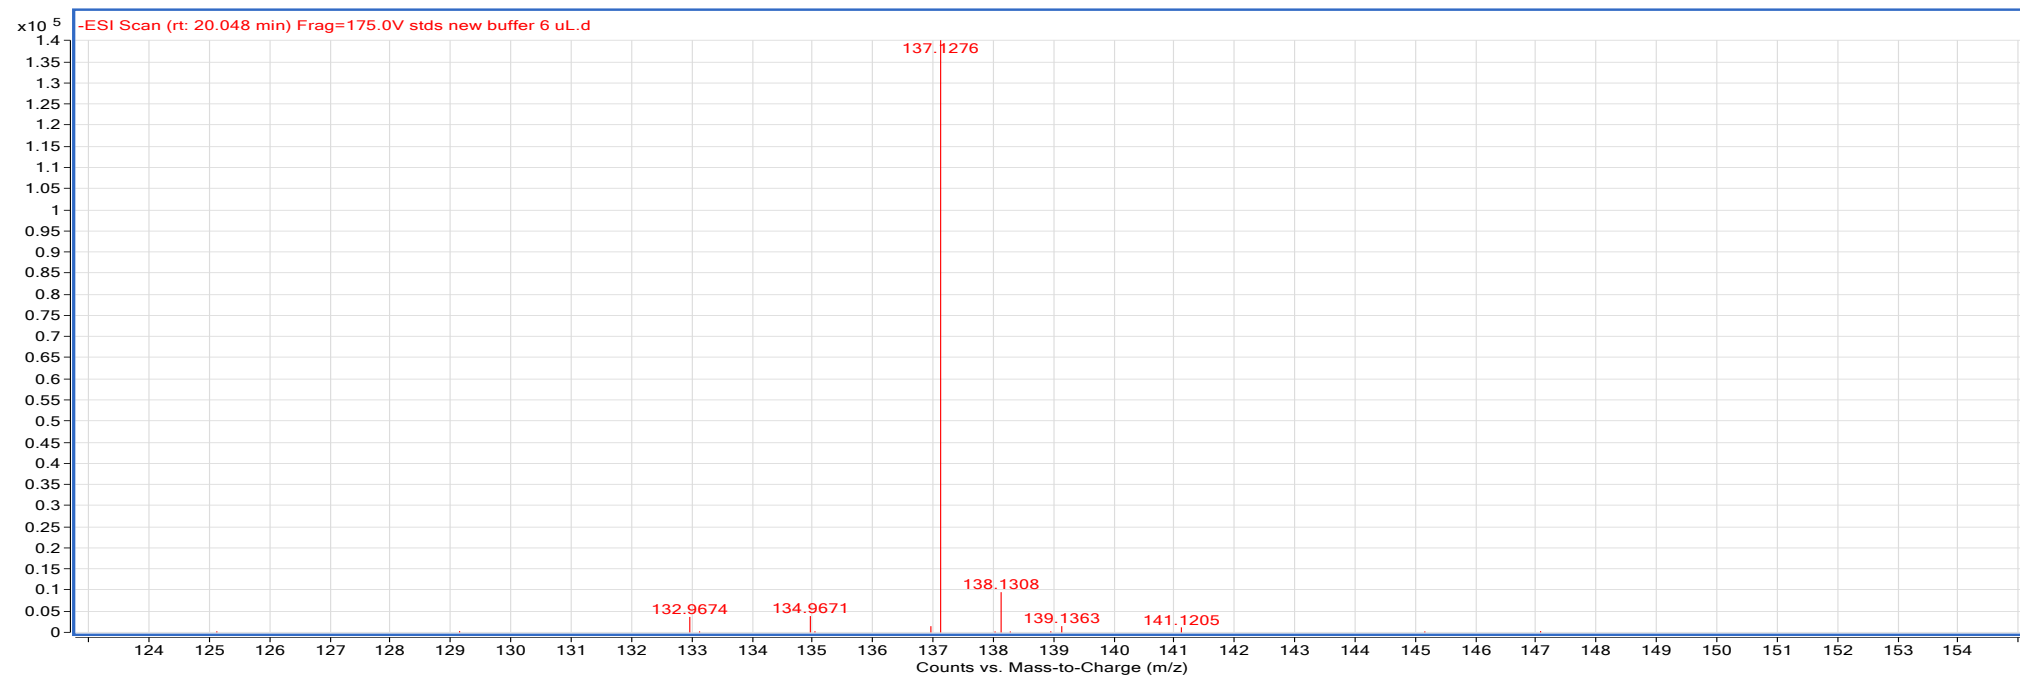

(d)

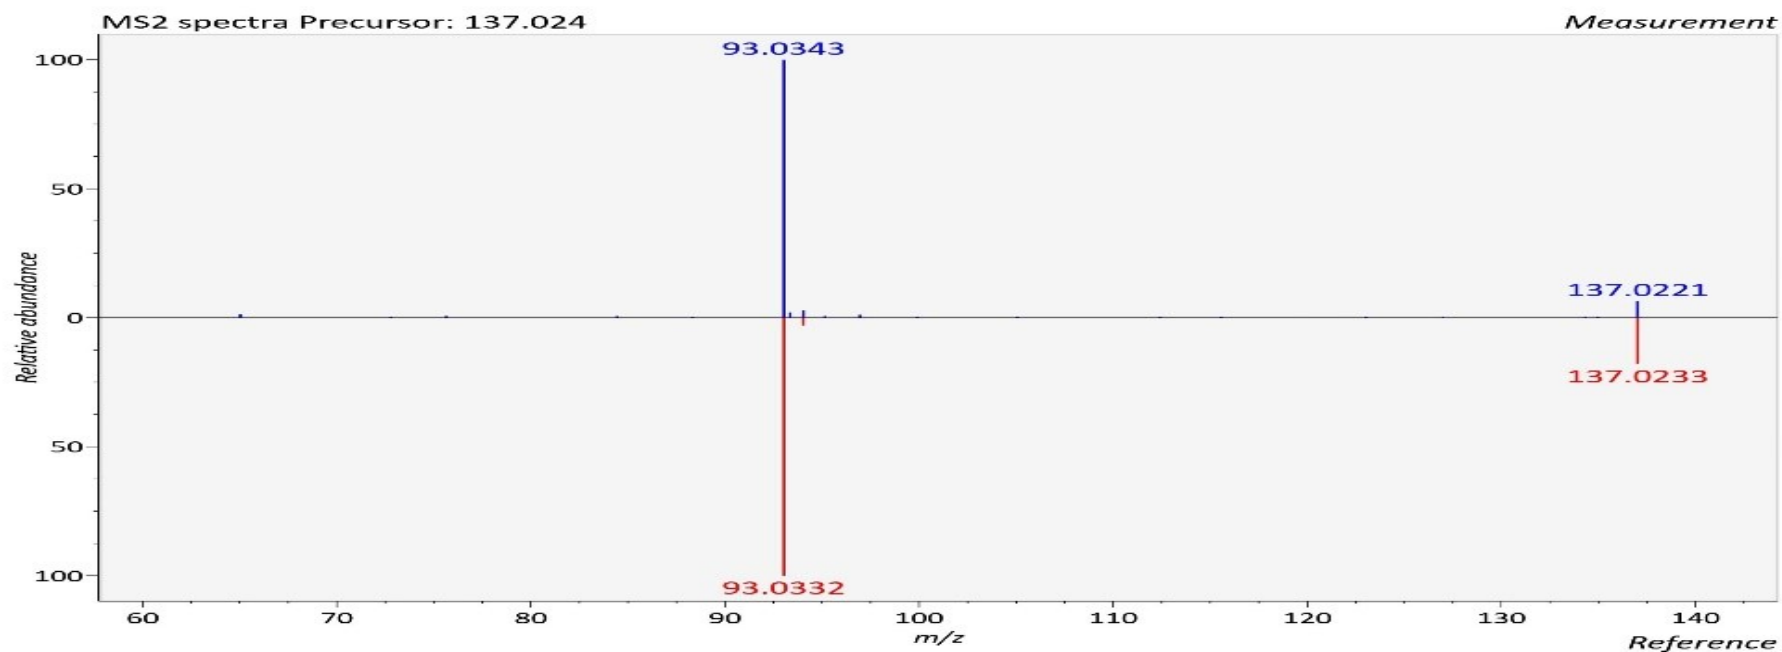

(e)

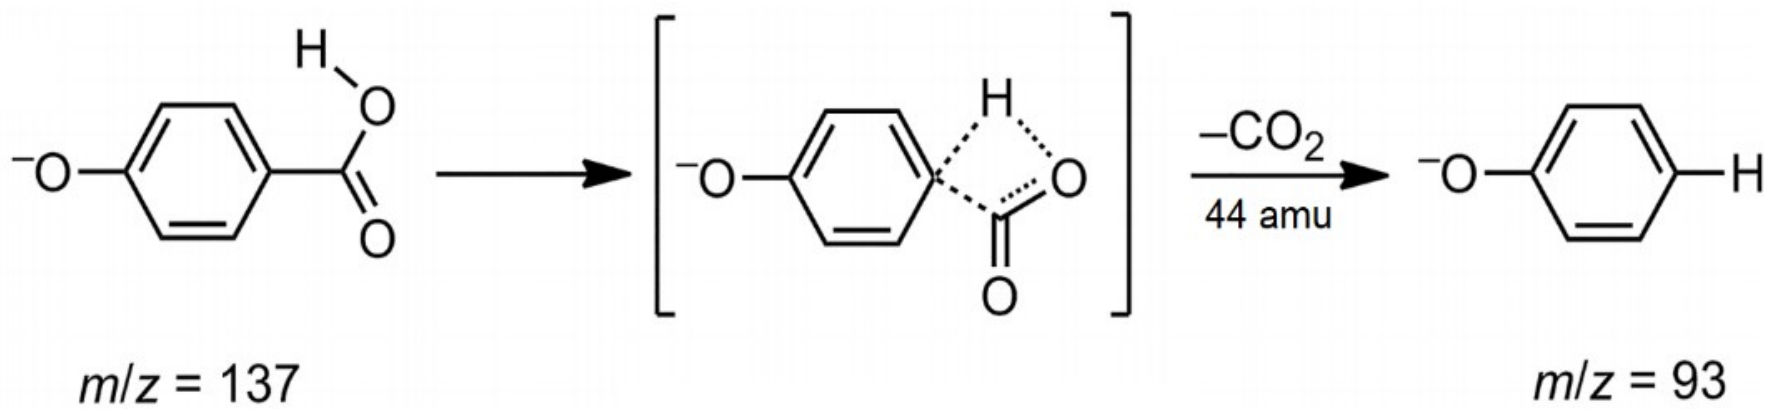

**(f)**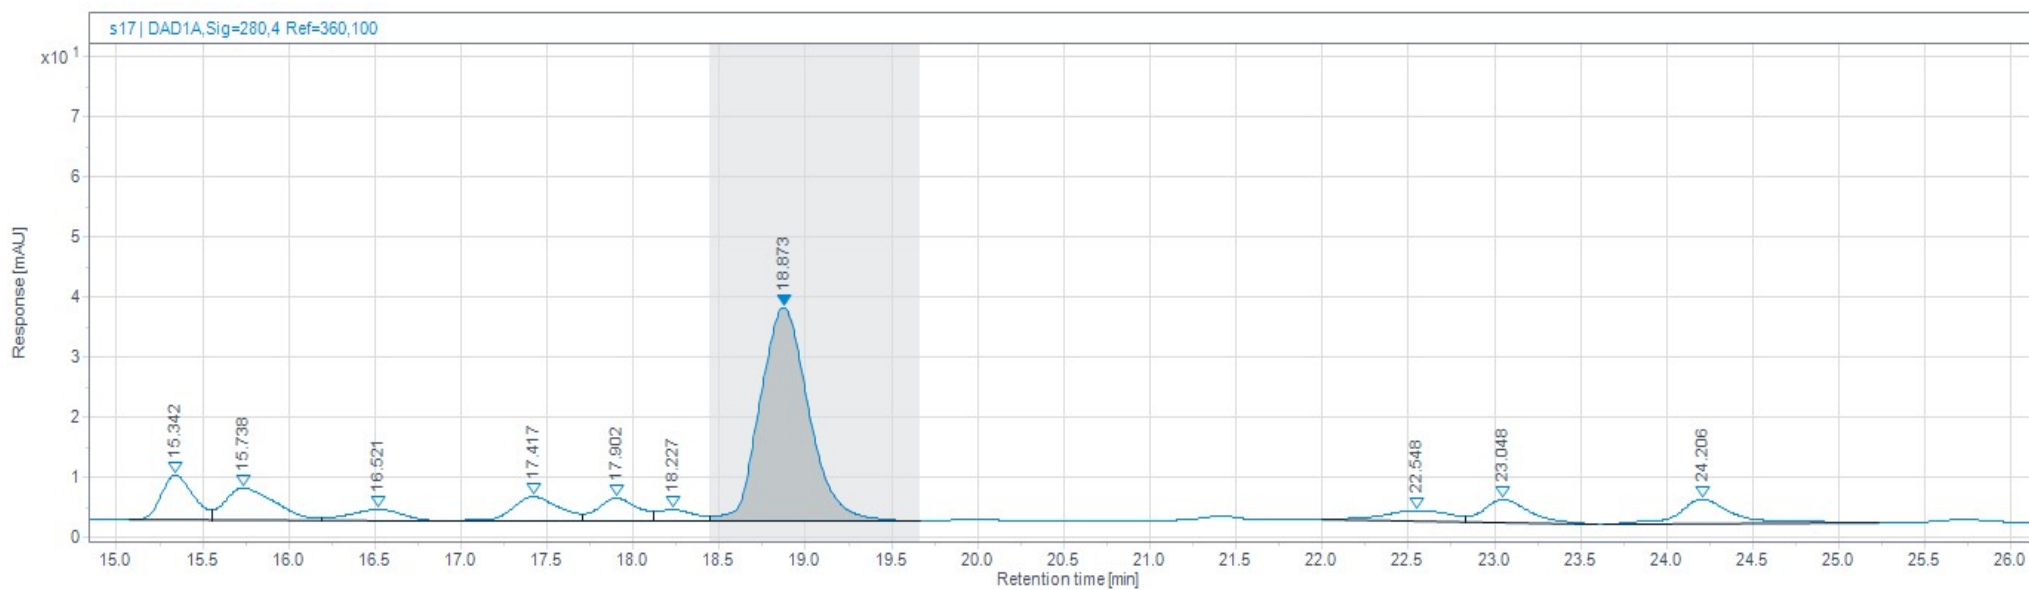**(g)**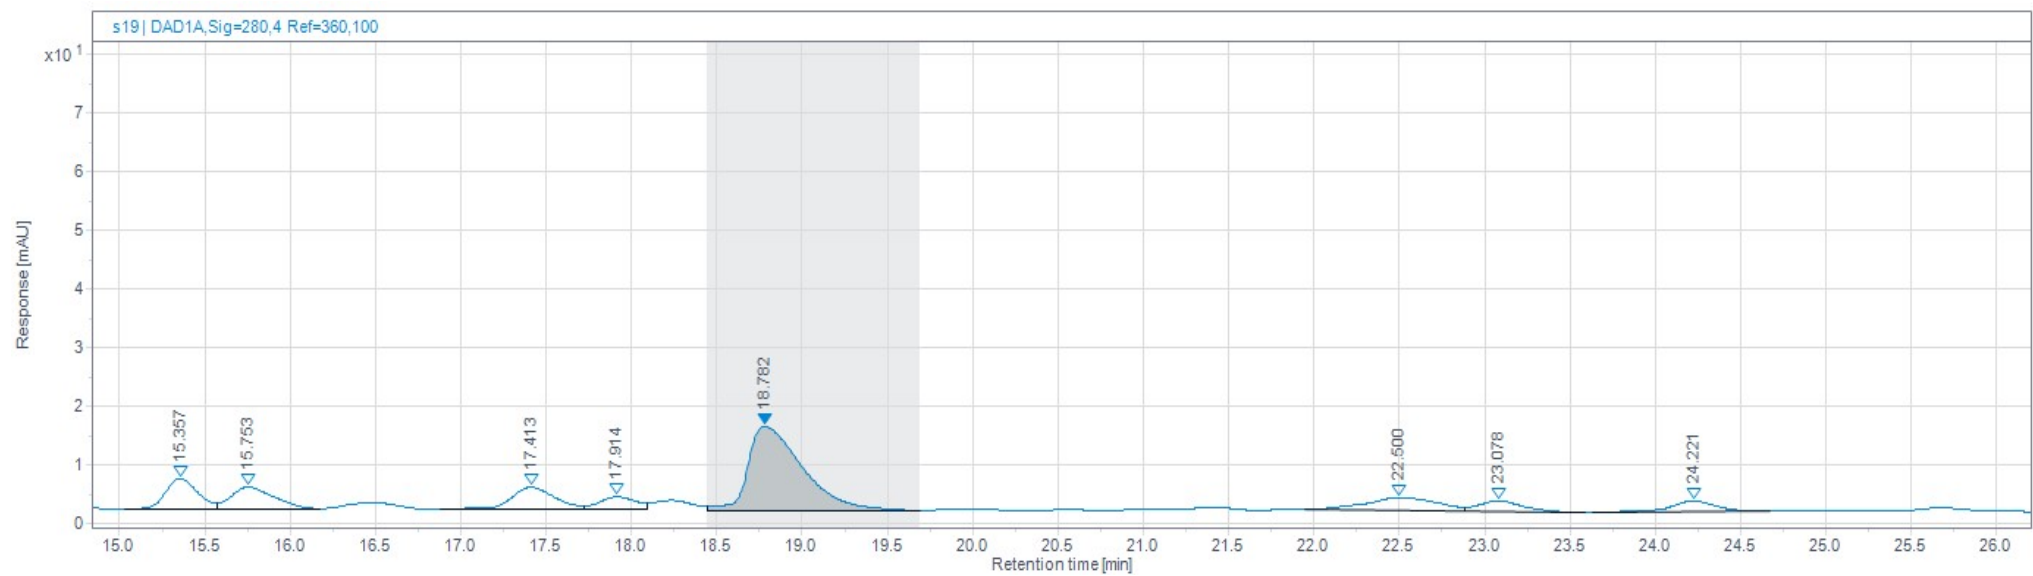

**h)**

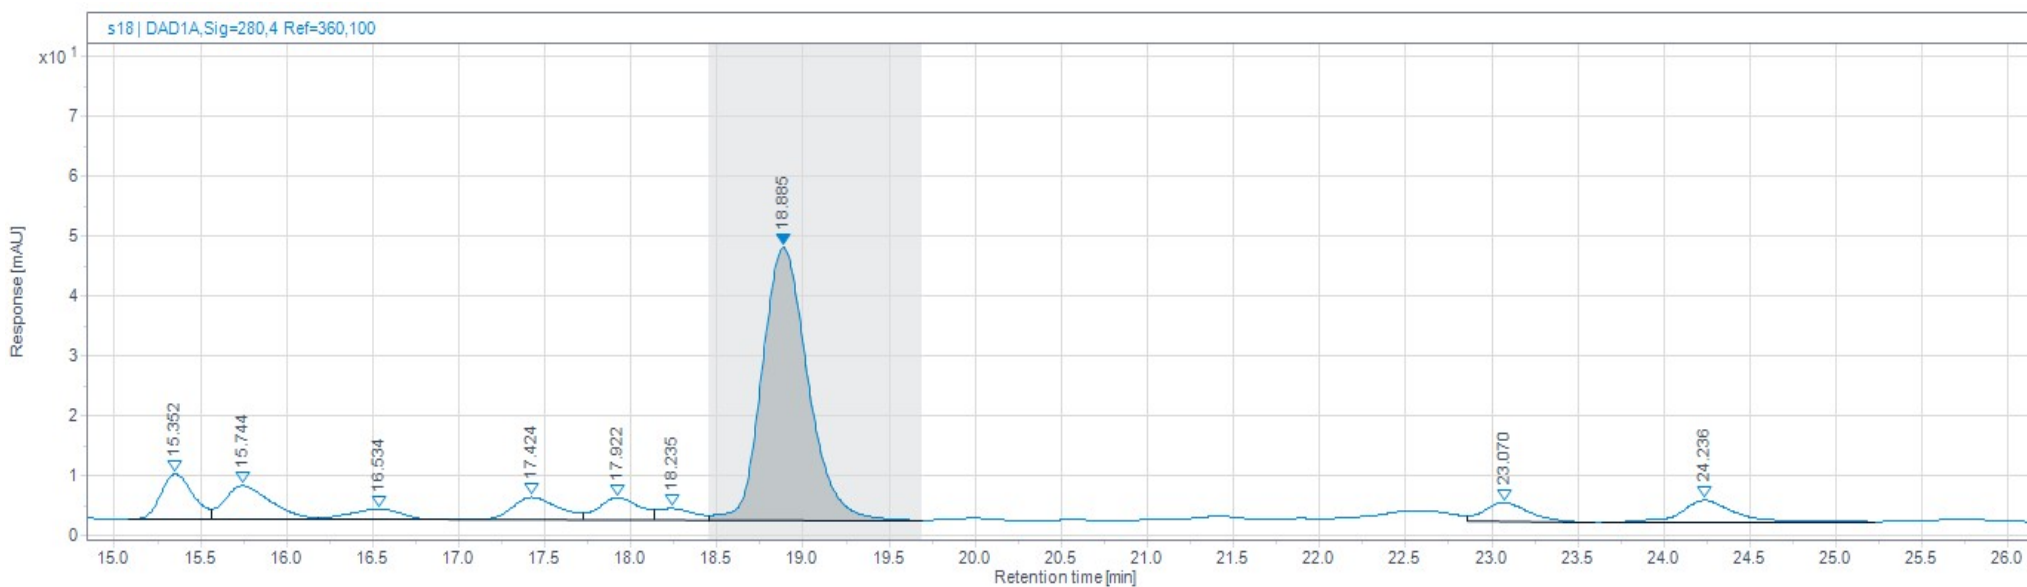

**i)**

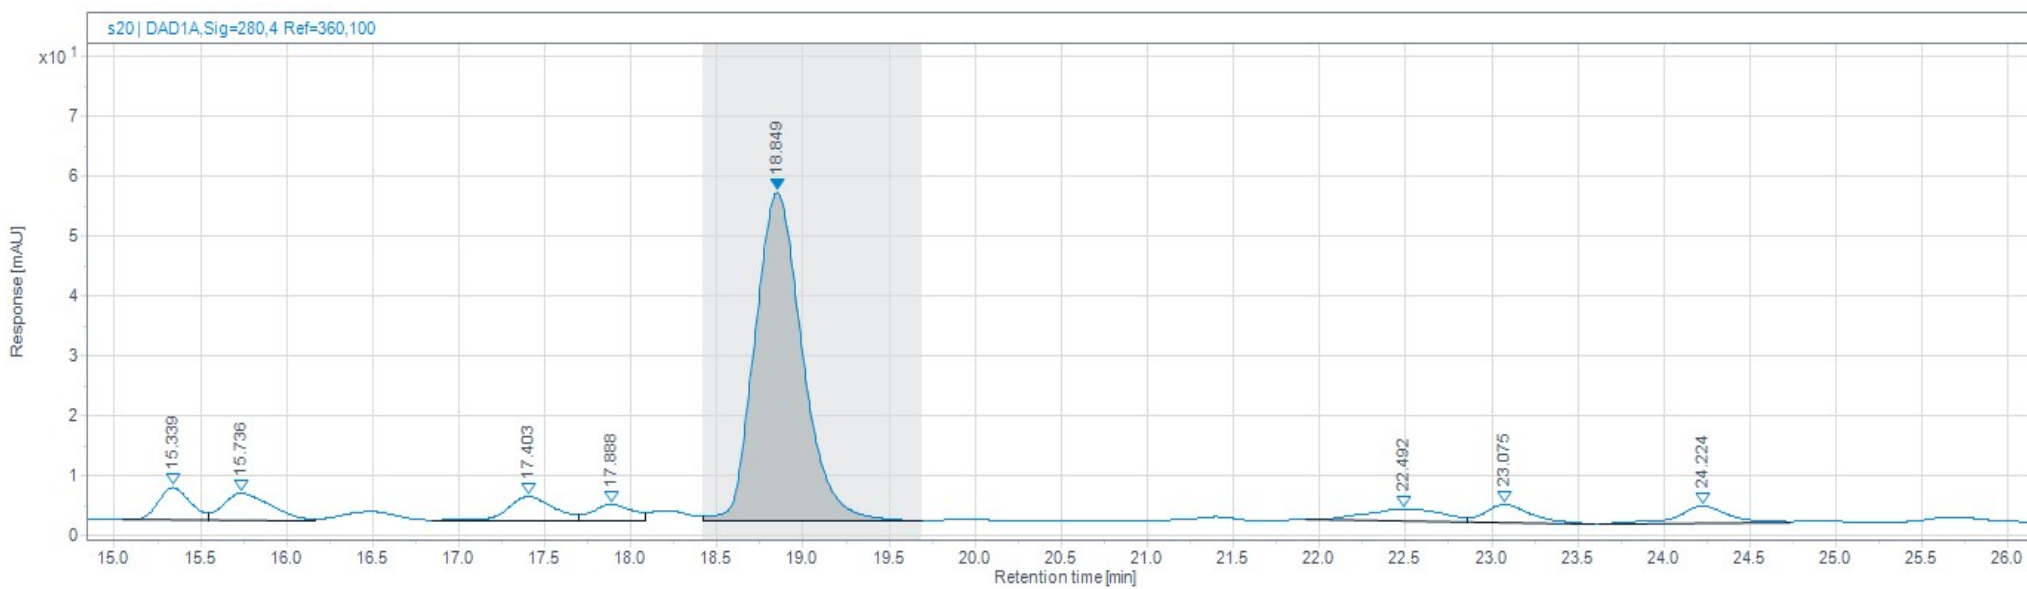

**Figure 1S: HPLC Separation and LCMS characterization of 21 phenolic compounds standard mixture.** (a) LCMS Chromatogram of phenolics standard mixture, extracted and characterized through high-performance liquid chromatography coupled with electrospray ionization-quadrupole-time of flight-mass spectrometry (LC-ESI-QTOF-MS/MS). (b) A chromatograph of *p*-hydroxybenzoic acid (Compound 2, Table 1S), Retention time (RT = 19.071 min) in the negative mode of ionization (ESI<sup>-</sup> / [M – H]<sup>-</sup>); (c) Mass spectra of *p*-hydroxybenzoic acid with observed/precursor of *m/z* 137.1276; (d) MS / MS spectrum of *p*-hydroxybenzoic acid reflecting the product ion of *m/z* 93, confirmation via online LC-MS library and database; (e) Fragmentation of *p*-hydroxybenzoic acid in negative mode [M – H]<sup>-</sup>, with observed/precursor of *m/z* 137, showing product ion of *m/z* 93 due to the loss of a CO<sub>2</sub> (44 Da); (f) A HPLC chromatogram of *p*-hydroxybenzoic acid (λ 280 nm) in Oxheart tomato sample; (g) Kumato tomato sample; (h) Green Zebra tomato sample and (i) Roma tomato sample.
